# Supplementary material for: Synthesis, stereochemistry, bonding and fluxionality of 2-(inden-3-yl)phenols and their cyclopentadienyl titanium derivatives
Source: Royal Society of Chemistry journal article supplement (doi:10.1039/b310415j), 2003-01-01

Supplementary Material (ESI) for Dalton Transactions  
This journal is © The Royal Society of Chemistry 2003

**Supporting Information for**

**Synthesis, Stereochemistry, Bonding and Fluxionality of 2-(Inden-3-yl)phenols and their Cyclopentadienyl Titanium Derivatives.**

Luke E. Turner,<sup>†</sup> Matthew G. Thorn,<sup>†</sup> R. D. Swartz II,<sup>†</sup> Robert W. Chesnut,<sup>‡</sup>  
Phillip E. Fanwick,<sup>†</sup> and Ian P. Rothwell\*<sup>†</sup>

<sup>†</sup> Purdue University, Department of Chemistry, 560 Oval Drive, West Lafayette, IN 47907-2038, USA

<sup>‡</sup>Department of Chemistry, Eastern Illinois University, 600 Lincoln Avenue, IL 61920

- E-mail, [Rothwell@purdue.edu](mailto:Rothwell@purdue.edu)

Supplementary Material (ESI) for Dalton Transactions  
This journal is © The Royal Society of Chemistry 2003

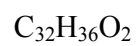

Supplementary Material (ESI) for Dalton Transactions  
This journal is © The Royal Society of Chemistry 2003

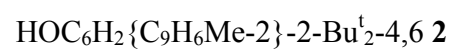

Supplementary Material (ESI) for Dalton Transactions  
This journal is © The Royal Society of Chemistry 2003

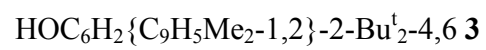

Supplementary Material (ESI) for Dalton Transactions  
This journal is © The Royal Society of Chemistry 2003

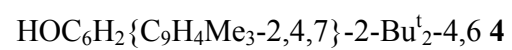

Supplementary Material (ESI) for Dalton Transactions  
This journal is © The Royal Society of Chemistry 2003

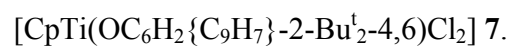

Supplementary Material (ESI) for Dalton Transactions  
This journal is © The Royal Society of Chemistry 2003

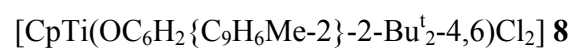

Supplementary Material (ESI) for Dalton Transactions  
This journal is © The Royal Society of Chemistry 2003

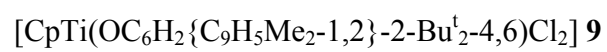



Supplementary Material (ESI) for Dalton Transactions  
This journal is © The Royal Society of Chemistry 2003

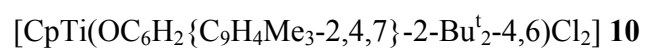

Supplementary Material (ESI) for Dalton Transactions  
This journal is © The Royal Society of Chemistry 2003

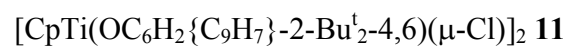

Supplementary Material (ESI) for Dalton Transactions  
This journal is © The Royal Society of Chemistry 2003

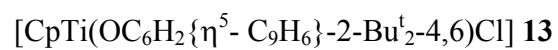

Supplement: b310415j.pdf [file b310415j.pdf]
